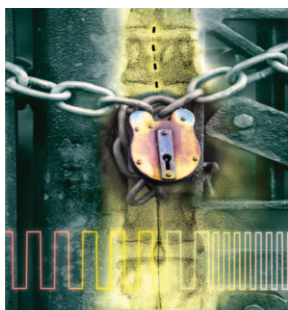

## ON THE COVER:

Recently, spinal cord stimulation with higher frequency than in the past has been applied for treatment of chronic pain. Laboratory work in this issue shows different mechanisms and time course of effects with these higher frequencies.

- Clark: Spinal Cord Stimulation: Does Frequency Matter?, p. 243
- Shechter *et al.*: Conventional and Kilohertz-frequency Spinal Cord Stimulation Produces Intensity- and Frequency-dependent Inhibition of Mechanical Hypersensitivity in a Rat Model of Neuropathic Pain, p. 422

## ◆ THIS MONTH IN ANESTHESIOLOGY

3A

## ◆ EDITORIAL VIEWS

### Spinal Cord Stimulation: Does Frequency Matter?

243

*J. David Clark*

### Patient Satisfaction with Anesthesia: Beauty Is in the Eye of the Consumer

245

*Thomas R. Vetter, Nataliya V. Ivankova, and Jean-Francois Pittet*

### The Great Fluid Debate: When Will Physiology Prevail?

248

*Can Ince*

### Phrenic Nerve Function after Interscalene Block Revisited: Now, the Long View

250

*Quinn H. Hogan*

### δ Opioid Receptor Antagonists: Do They Buy Time for Traumatic Hemorrhagic Shock Patients?

253

*Jacques Duranteau and Yannick Le Manach*

## ■ PERIOPERATIVE MEDICINE

### ◆ Acute Normovolemic Hemodilution in the Pig Is Associated with Renal Tissue Edema, Impaired Renal Microvascular Oxygenation, and Functional Loss

256

*Franziska M. Konrad, Egbert G. Mik, Sander I. A. Bodmer, N. Bahar Ates, Henriëtte F. E. M. Willems, Karin Klingel, Hilde R. H. de Geus, Robert Jan Stolker, and Tanja Johannes*

Compared to colloid (hydroxyethyl starch 6% 130/0.4), normovolemic hemodilution with crystalloid (balanced electrolyte solution) produced greater renal hypoxia indicating the diluent may be a factor when evaluating hemodilution and acute kidney injury.

◆ Refers to This Month in Anesthesiology

◆ Refers to Editorial Views

MA Meeting Article

🌐 See Supplemental Digital Content

CME CME Article

◇ **Postoperative B-type Natriuretic Peptide for Prediction of Major Cardiac Events in Patients Undergoing Noncardiac Surgery: Systematic Review and Individual Patient Meta-analysis** 270

*Reitze N. Rodseth, Bruce M. Biccard, Rong Chu, Giovana A. Lurati Buse, Lehana Thabane, Ameet Bakhai, Daniel Bolliger, Lucio Cagini, Thomas J. Cahill, Daniela Cardinale, Carol P. W. Chong, Miłostaw Cnotliwy, Salvatore Di Somma, René Fahrner, Wen K. Lim, Elisabeth Mahla, Yannick Le Manach, Ramaswamy Manikandan, Wook B. Pyun, Sriram Rajagopalan, Milan Radović, Robert C. Schutt, Daniel I. Sessler, Stuart Suttie, Thuvaraha Vanniyasingam, Marek Waliszek, and P. J. Devereaux*

This individual patient level meta-analysis indicates that increased postoperative B-type natriuretic peptide predicts mortality, cardiac mortality, mortality or nonfatal myocardial infarction, and cardiac failure at 30 days and 180 days or more after noncardiac surgery.

🌐 **Increased Perioperative B-type Natriuretic Peptide Associates with Heart Failure Hospitalization or Heart Failure Death after Coronary Artery Bypass Graft Surgery** 284

*Amanda A. Fox, Luigino Nascimben, Simon C. Body, Charles D. Collard, Aya A. Mitani, Kuang-Yu Liu, Jochen D. Muehlschlegel, Stanton K. Sherman, and Edward R. Marcantonio*

In a secondary analysis of an observational study of 1,025 coronary artery bypass graft surgical patients, increased perioperative plasma B-type natriuretic peptide independently predicted 5-yr heart failure hospitalization and heart failure death.

**Automated Alerting and Recommendations for the Management of Patients with Preexisting Hypoxia and Potential Acute Lung Injury: A Pilot Study** 295

*James M. Blum, Michael J. Stentz, Michael D. Maile, Elizabeth Jewell, Krishnan Raghavendran, Milo Engoren, and Jesse M. Ehrenfeld*

In an open-label parallel arm study of 100 patients with acute respiratory distress syndrome receiving low tidal volume ventilation, sending the anesthesia providers an alert with a recommended tidal volume of 6 ml/kg resulted in a significant reduction in tidal volume delivered during anesthesia compared with conventional care. Complications and major morbidity did not differ between groups.

CME **Effect of Intraoperative High Inspired Oxygen Fraction on Surgical Site Infection, Postoperative Nausea and Vomiting, and Pulmonary Function: Systematic Review and Meta-analysis of Randomized Controlled Trials** 303

*Frédérique Hovaguimian, Christopher Lysakowski, Nadia Elia, and Martin R. Tramèr*

Intraoperative high  $F_{iO_2}$  decreases the risk of surgical site infection in surgical patients receiving prophylactic antibiotics, has a weak beneficial effect on nausea, and does not increase the risk of postoperative atelectasis.

**Calabadiol: A New Agent to Reverse the Effects of Benzylisoquinoline and Steroidal Neuromuscular-blocking Agents** 317

*Ulrike Hoffmann, Martina Grosse-Sundrup, Katharina Eikermann-Haerter, Sebastina Zaremba, Cenk Ayata, Ben Zhang, Da Ma, Lyle Isaacs, and Matthias Eikermann*

In healthy rats, calabadiol 1 produced a dose-dependent reversal of neuromuscular blockade from cisatracurium and rocuronium without affecting heart rate, blood pressure, or arterial blood gas tensions or pH.

**Low-frequency Neuromuscular Depression Is a Consequence of a Reduction in Nerve Terminal  $Ca^{2+}$  Currents at Mammalian Motor Nerve Endings** 326

*Eugene M. Silinsky*

The results demonstrate that neuromuscular depression during train-of-four monitoring is due to a decline in nerve terminal  $Ca^{2+}$  currents. More profound stimulation conditions seem to be required for depletion of acetylcholine stores.

**Xenon Neurotoxicity in Rat Hippocampal Slice Cultures Is Similar to Isoflurane and Sevoflurane** 335

*Heather Brosnan and Philip E. Bickler*

Using postnatal rat hippocampal slice cultures, the authors demonstrated that xenon used at 1 minimum alveolar concentration-equivalent concentration increased apoptosis similar to sevoflurane and isoflurane at equipotent concentrations, and that this effect was abolished by preconditioning the tissue with a subtoxic concentration of isoflurane.

**Neither Xenon nor Fentanyl Induces Neuroapoptosis in the Newborn Pig Brain** 345  
*Hemmen Sabir, Sarah Bishop, Nicki Cohen, Elke Maes, Xun Liu, John Dingley, and Marianne Thoresen*

Using a model of mechanically ventilated piglets in the absence of brain injury, the authors could show that neither 24 h of 50% inhaled xenon nor fentanyl, alone or in combination, induced apoptosis in the neonatal pig brain in normothermic or hypothermic conditions. Isoflurane 2% was found to induce apoptosis in this experimental paradigm.

**Developmental Effects of Neonatal Isoflurane and Sevoflurane Exposure in Rats** 358  
*Christoph N. Seubert, Wanting Zhu, Christopher Pavlinec, Nikolaus Gravenstein, and Anatoly E. Martynyuk*

At subanesthetic concentrations isoflurane and sevoflurane produce developmental effects in neonatal rats acting *via* similar mechanisms that may involve an increase in neuronal activity. At the same time, substantial differences in the effects of the two drugs suggest differences in the mechanisms mediating their actions and in their safety profile for neonatal anesthesia.

 **Interactions of Cardiopulmonary Bypass and Erythrocyte Transfusion in the Pathogenesis of Pulmonary Dysfunction in Swine** 365  
*Nishith N. Patel, Hua Lin, Ceri Jones, Graham Walkden, Paramita Ray, Philippa A. Sleeman, Gianni D. Angelini, and Gavin J. Murphy*

Allogeneic erythrocyte transfusion of older erythrocytes causes pulmonary dysfunction that is characterized by marked neutrophil/macrophage infiltration. Moreover, transfusion interacted with cardiopulmonary bypass to increase lung injury.

■ **CRITICAL CARE MEDICINE**

 **δ Opioid Receptor Antagonist, ICI 174,864, Is Suitable for the Early Treatment of Uncontrolled Hemorrhagic Shock in Rats** 379  
*Liangming Liu, Kunlun Tian, Yu Zhu, Xiaoli Ding, and Tao Li*

ICI 174,864 with or without low volumes of Ringer's lactate, dose-dependently increased blood pressure and prolonged short-term survival in rats subjected to uncontrolled hemorrhagic shock. Survival was markedly higher in rats treated with ICI 174,864 than those with standard fluid resuscitation once bleeding was controlled.

  **Muscle Weakness Predicts Pharyngeal Dysfunction and Symptomatic Aspiration in Long-term Ventilated Patients** 389  
*Hooman Mirzakhani, June-Noelle Williams, Jennifer Mello, Sharma Joseph, Matthew J. Meyer, Karen Waak, Ulrich Schmidt, Emer Kelly, and Matthias Eikermann*

In 30 critically ill adult patients mechanically ventilated more than 10 days, extremity muscle weakness assessed by medical research council score was an independent predictor of swallowing dysfunction and symptomatic aspiration after extubation.

 **Higher Frequency Ventilation Attenuates Lung Injury during High-frequency Oscillatory Ventilation in Sheep Models of Acute Respiratory Distress Syndrome** 398  
*Songqiao Liu, Yang Yi, Maohua Wang, Qihua Chen, Yingzi Huang, Ling Liu, Jianfeng Xie, Dunyuan Zhou, and Haibo Qiu*

This study suggests that high-frequency oscillatory ventilation at higher frequencies minimizes lung stress and tidal volume, resulting in less lung injury and reduced local lung inflammation.

**Prolonged Administration of Pyridostigmine Impairs Neuromuscular Function with and without Down-regulation of Acetylcholine Receptors** 412  
*Martina Richtsfeld, Shingo Yasuhara, Heidrun Fink, Manfred Blobner, and J. A. Jeevendra Martyn*

Prolonged administration of pyridostigmine (25 mg·kg<sup>-1</sup>·day<sup>-1</sup>) leads to neuromuscular impairment, even if discontinued for 24 h. This impairment appears to be associated with, but is also independent of, acetylcholine receptor down-regulation.

# CONTENTS

## ■ PAIN MEDICINE

- ◆ ◆ ◆ **Conventional and Kilohertz-frequency Spinal Cord Stimulation Produces Intensity- and Frequency-dependent Inhibition of Mechanical Hypersensitivity in a Rat Model of Neuropathic Pain** 422

*Ronen Shechter, Fei Yang, Qian Xu, Yong-Kwan Cheong, Shao-Qiu He, Andrei Sdrulla, Alene F. Carteret, Paul W. Wacnik, Xinzhong Dong, Richard A. Meyer, Srinivasa N. Raja, and Yun Guan*

The effectiveness of spinal cord stimulation in the treatment of neuropathic pain depends on stimulation frequency and intensity. In a rat model of neuropathic pain, the intensity-dependent (20%, 40%, 80% of motor threshold) attenuation of pain by bipolar spinal cord stimulation at frequencies of 50 Hz, 1 kHz, and 10 kHz was studied on three consecutive days after L5 spinal nerve ligation. At a stimulation intensity that was 80% of the motor threshold, 1-kHz spinal cord stimulation reduced mechanical hypersensitivity more than 50-Hz stimulation did, with an earlier onset of analgesic effect (day 1 *vs.* day 2). The effect of 1-kHz stimulation was observed even at 40% of the motor threshold. The C-fiber component of wide dynamic range neuronal wind-up was reduced only at a 50-Hz stimulation frequency. Pain relief by kilohertz level and 50-Hz stimulation may involve different peripheral and spinal segmental mechanisms.

- Effects of General Anesthetics on Substance P Release and c-Fos Expression in the Spinal Dorsal Horn** 433

*Toshifumi Takasusuki, Shigeki Yamaguchi, Shinsuke Hamaguchi, and Tony L. Yaksh*

These studies in rats suggest that although both volatile and injectable anesthetics reduce overall spinal nociceptive signaling, they unexpectedly do not alter peptide release from primary afferents; only fentanyl and the combination of isoflurane and nitrous oxide exert a presynaptic effect by blocking dorsal horn substance P release.

## ■ EDUCATION

### CASE SCENARIO

- Hypotonia in Infancy: Anesthetic Dilemma** 443

*Angela K. Saettele, Anshuman Sharma, and David J. Murray*

### IMAGES IN ANESTHESIOLOGY

- Sevoflurane-induced Epileptiform Electroencephalographic Activity and Generalized Tonic–Clonic Seizures in a Volunteer Study** 447

*Stefanie Pilge, Denis Jordan, Eberhard F. Kochs, and Gerhard Schneider*

- Airway Management in a Child with a Large Retropharyngeal Mass—A Lesson Learned: How Conventional Rules of Endotracheal Tube Fixation Can Be Deceptive** 448

*Shruti Redhu and Bhadrinarayan Varadarajan*

### ANESTHESIA LITERATURE REVIEW 449

#### REVIEW ARTICLE

- ◆ **Patient-Satisfaction Measures in Anesthesia: Qualitative Systematic Review** 452

*Sarah F. Barnett, Ravi K. Alagar, Michael P. W. Grocott, Savvas Giannaris, John R. Dick, and Suneetha Ramani Moonesinghe*

Identification of all published questionnaires used to measure patient satisfaction with anesthesia, and the qualitative appraisal of the psychometric development and validation processes of these tools are discussed.

#### MIND TO MIND

- Learning from a Master** 479

*Gregory L. Rose*

- Anesthesiology: An Art or a Science?** 482

*Rakhee Goyal*

- An Anesthesia Resident's Prayer** 483

*Jody C. Leng*

## CONTENTS

### CASE REPORT

- ◆ **Surgical Treatment of Permanent Diaphragm Paralysis after Interscalene Nerve Block for Shoulder Surgery** 484  
*Matthew R. Kaufman, Andrew I. Elkwood, Michael I. Rose, Tushar Patel, Russell Ashinoff, Ryan Fields, and David Brown*

### ■ CORRESPONDENCE

- Does Helium Act on Vascular Endothelial Function in Humans?** 488  
*Hiroyuki Kinoshita, Noboru Hatakeyama, and Yoshihiro Fujiwara*

**In Reply**

*Kirsten F. Smit, Markus W. Hollmann, Nina C. Weber, and Benedikt Preckel*

- 
- Differentiating Inspiratory and Expiratory Valve Malfunctions** 489  
*Chris Giordano, Nikolaus Gravenstein, and Mark J. Rice*

**In Reply**

*Bhavani Shankar Kodali*

- 
- The Airway Paradigm: What Really Changed?** 490  
*Robert M. Knapp*

**In Reply**

*Olivier Langeron, Philippe Cuvillon, Cristina Ibanez-Esteve, François Lenfant, Bruno Riou, and Yannick Le Manach*

### ■ REVIEWS OF EDUCATIONAL MATERIAL

493

### ■ CAREERS & EVENTS

23A

## INSTRUCTIONS FOR AUTHORS

The most recently updated version of the Instructions for Authors is available at [www.anesthesiology.org](http://www.anesthesiology.org). Please refer to the Instructions for the preparation of any material for submission to ANESTHESIOLOGY.

Manuscripts submitted for consideration for publication must be submitted in electronic format. The preferred method is via the Journal's Web site (<http://www.anesthesiology.org>). Detailed directions for submissions and the most recent version of the Instructions for Authors can be found on the Web site (<http://www.anesthesiology.org>). Books and educational materials should be sent to Michael J. Avram, Ph.D., Department of Anesthesiology, Northwestern University Feinberg School of Medicine, Ward Memorial Building, Room 13-199, 303 East Chicago Avenue, Chicago, IL 60611-3008. Requests for permission to duplicate materials published in ANESTHESIOLOGY should be submitted in electronic format, to the Permissions Department ([journalpermissions@lww.com](mailto:journalpermissions@lww.com)). Advertising and related correspondence should be addressed to Advertising Manager, ANESTHESIOLOGY, Lippincott Williams & Wilkins, Two Commerce Square, 2001 Market Street, Philadelphia, Pennsylvania 19103 (Web site: <http://www.lww.com/advertisingratecards/>). Publication of an advertisement in ANESTHESIOLOGY does not constitute endorsement by the Society or Lippincott Williams & Wilkins, Inc. of the product or service described therein or of any representations made by the advertiser with respect to the product or service.

**ANESTHESIOLOGY** (ISSN 0003-3022) is published monthly by Lippincott Williams & Wilkins, 16522 Hunters Green Parkway, Hagerstown, MD 21740-2116. Business office: Two Commerce Square, 2001 Market Street, Philadelphia, PA 19103. Periodicals postage paid at Hagerstown, MD, and at additional mailing offices. Copyright © 2013, the American Society of Anesthesiologists, Inc.

**Annual Subscription Rates:** *United States*—\$719 Individual, \$1309 Institution, \$289 In-training. *Rest of World*—\$759 Individual, \$1454 Institution, \$289 In-training. Single copy rate \$126. Subscriptions outside of North America must add \$52 for airfreight delivery. Add state sales tax, where applicable. The GST tax of 7% must be added to all orders shipped to Canada (Lippincott Williams & Wilkins' GST Identification #895524239, Publications Mail Agreement #1119672). Indicate in-training status and name of institution. Institution rates apply to libraries, hospitals, corporations, and partnerships of three or more individuals. Subscription prices outside the United States must be prepaid. Prices subject to change without notice. Subscriptions will begin with currently available issue unless otherwise requested. Visit us online at [www.lww.com](http://www.lww.com).

Individual and in-training subscription rates include print and access to the online version. Online-only subscriptions for individuals (\$245) and persons in training (\$245) are available to nonmembers and may be ordered by downloading a copy of the Online Subscription FAXback Form from the Web site, completing the information requested, and faxing the completed form to 301-223-2400/44 (0) 20 7981 0535. Institutional rates are for print only; online subscriptions are available via Ovid. Institutions can choose to purchase a print and online subscription together for a discounted rate. Institutions that wish to purchase a print subscription, please contact Lippincott Williams & Wilkins, 16522 Hunters Green Parkway, Hagerstown, MD 21740-2116; phone: 1-800-638-3030 (outside the United States 301-223-2300/44 (0) 20 7981 0525); fax: 301-223-2400/44 (0) 20 7981 0535. Institutions that wish to purchase an online subscription or online with print, please contact the Ovid Regional Sales Office near you or visit [www.ovid.com/site/index.jsp](http://www.ovid.com/site/index.jsp) and select Contact and Locations.

**Address for non-member subscription information, orders, or change of address:** Lippincott Williams & Wilkins, 16522 Hunters Green Parkway, Hagerstown, MD 21740-2116; phone: 1-800-638-3030 (outside the United States 301-223-2300/44 (0) 20 7981 0525); fax: 301-223-2400/44 (0) 20 7981 0535; email: [customerservice@lww.com](mailto:customerservice@lww.com). In Japan, contact LWW Japan Ltd., 3-23-14 Hongo, Bunkyo-ku, Tokyo 113, Japan; phone: 81-3-5689-5400; fax: 81-3-5689-5402; email: [bclaim@lwwis.co.jp](mailto:bclaim@lwwis.co.jp). In Bangladesh, India, Nepal, Pakistan, and Sri Lanka, contact Globe Publications Pvt. Ltd., B-13 3rd Floor, A Block, Shopping Complex, Naraina, Vihar, Ring Road, New Delhi 110028, India; phone: 91-11-25770411; fax: 91-11-25778876; email: [info@globepub.com](mailto:info@globepub.com).

**Address for member subscription information, orders, or change of address:** Members of the American Society of Anesthesiologists receive the print and online journal with their membership. To become a member or provide a change of address, please contact the American Society of Anesthesiologists, 520 N. Northwest Highway, Park Ridge, IL 60068-2573; phone: 847-825-5586; fax: 847-825-1692; email: [membership@ASAhq.org](mailto:membership@ASAhq.org). For all other membership inquiries, contact Lippincott Williams & Wilkins Customer Service Department, P.O. Box 1580, Hagerstown, MD 21741-1580; phone: 1-800-638-3030 (outside the United States 301-223-2300/44 (0) 20 7981 0525); fax: 301-223-2400/44 (0) 20 7981 0535; email: [memberservice@lww.com](mailto:memberservice@lww.com).

**Postmaster:** Send address changes to ANESTHESIOLOGY, P.O. BOX 1550, Hagerstown, MD 21740.

**Advertising:** Please contact Michelle Smith, Senior Account Manager, Advertising, Lippincott Williams & Wilkins, 333 Seventh Avenue, 19th Floor, New York, NY 10001; tel: (646) 674-6537, fax: (646) 607-5479, e-mail: [Michelle.Smith@wolterskluwer.com](mailto:Michelle.Smith@wolterskluwer.com). For classified advertising: Keida Spurlock, Recruitment Advertising Representative, Lippincott Williams & Wilkins, Two Commerce Square, 2001 Market Street, Philadelphia, PA 19103; tel: (215) 521-8501, fax: (215) 689-2453. e-mail: [Keida.Spurlock@wolterskluwer.com](mailto:Keida.Spurlock@wolterskluwer.com).
